# Supplementary material
Source: MDPI journal article supplement (https://www.mdpi.com/2075-163X/11/9/966)
Supplement: s1 [file s1]

**Electronic supplementary material.**

**Table S1.** Inductively Coupled Plasma Optical Emission Spectrometry (ICP-OES), Thermo Electron ICAP 6500 Duo detection limits and quality control details. Analytical method code 721P with sodium peroxide fusion.

|                            |        |        |        |        |        |        |        |        |
|----------------------------|--------|--------|--------|--------|--------|--------|--------|--------|
| Parameter                  | Al     | As     | Ba     | Be     | Ca     | Co     | Cr     | Cu     |
| Unit                       | %      | %      | %      | %      | %      | %      | %      | %      |
| Detection limit            | 0.01   | 0.01   | 0.003  | 0.001  | 0.01   | 0.001  | 0.003  | 0.004  |
| 19042290 / QCBLIND         | <0.01  | <0.01  | <0.003 | <0.001 | <0.01  | <0.001 | 0.004  | <0.004 |
| 19042290 (2) / QCBLIND     | <0.01  | <0.01  | <0.003 | <0.001 | <0.01  | <0.001 | 0.003  | <0.004 |
| 19042290 (3) / QCBLIND     | <0.01  | <0.01  | <0.003 | <0.001 | <0.01  | <0.001 | 0.004  | <0.004 |
| 19042290 (4) / QCBLIND     | <0.01  | <0.01  | <0.003 | <0.001 | <0.01  | <0.001 | 0.003  | <0.004 |
| 19042291 / QCGBMS304-6     | 5.81   | 0.27   | 0.055  | <0.001 | 7.12   | 0.012  | 0.039  | 0.429  |
| 19042291 (2) / QCGBMS304-6 | 5.73   | 0.28   | 0.057  | <0.001 | 7.07   | 0.012  | 0.039  | 0.434  |
| 19042292 / QCO153B         | 8.43   | 0.01   | 0.010  | <0.001 | 1.87   | 0.002  | 0.004  | 0.683  |
| 19042292 (2) / QCO153B     | 8.17   | <0.01  | 0.010  | <0.001 | 1.84   | <0.001 | 0.004  | 0.690  |
|                            |        |        |        |        |        |        |        |        |
| Parameter                  | Fe     | K      | La     | Li     | Mg     | Mn     | Mo     | Ni     |
| Unit                       | %      | %      | %      | %      | %      | %      | %      | %      |
| Detection limit            | 0.01   | 0.05   | 0.002  | 0.001  | 0.02   | 0.001  | 0.005  | 0.005  |
| 19042290 / QCBLIND         | 0.02   | <0.05  | <0.002 | <0.001 | <0.02  | <0.001 | <0.005 | <0.005 |
| 19042290 (2) / QCBLIND     | 0.03   | <0.05  | <0.002 | <0.001 | <0.02  | <0.001 | <0.005 | <0.005 |
| 19042290 (3) / QCBLIND     | 0.03   | <0.05  | <0.002 | 0.001  | <0.02  | <0.001 | <0.005 | <0.005 |
| 19042290 (4) / QCBLIND     | 0.03   | <0.05  | <0.002 | <0.001 | <0.02  | <0.001 | <0.005 | <0.005 |
| 19042291 / QCGBMS304-6     | 6.61   | 1.60   | <0.002 | 0.002  | 1.75   | 0.080  | <0.005 | 0.229  |
| 19042291 (2) / QCGBMS304-6 | 6.79   | 1.61   | <0.002 | 0.002  | 1.75   | 0.077  | <0.005 | 0.232  |
| 19042292 / QCO153B         | 3.79   | 1.21   | <0.002 | 0.001  | 1.67   | 0.029  | 0.016  | <0.005 |
| 19042292 (2) / QCO153B     | 3.93   | 1.20   | <0.002 | 0.002  | 1.67   | 0.030  | 0.017  | <0.005 |
|                            |        |        |        |        |        |        |        |        |
| Parameter                  | P      | Pb     | S      | Sb     | Sc     | Si     | Sr     | Ti     |
| Unit                       | %      | %      | %      | %      | %      | %      | %      | %      |
| Detection limit            | 0.05   | 0.01   | 0.02   | 0.01   | 0.002  | 0.05   | 0.003  | 0.01   |
| 19042290 / QCBLIND         | <0.05  | <0.01  | <0.02  | <0.01  | <0.002 | <0.05  | <0.003 | <0.01  |
| 19042290 (2) / QCBLIND     | <0.05  | <0.01  | <0.02  | <0.01  | <0.002 | 0.10   | <0.003 | <0.01  |
| 19042290 (3) / QCBLIND     | <0.05  | <0.01  | 0.02   | <0.01  | <0.002 | <0.05  | <0.003 | <0.01  |
| 19042290 (4) / QCBLIND     | <0.05  | <0.01  | <0.02  | <0.01  | <0.002 | 0.10   | <0.003 | <0.01  |
| 19042291 / QCGBMS304-6     | 0.09   | 0.03   | 2.10   | 0.02   | <0.002 | 20.3   | 0.019  | 0.31   |
| 19042291 (2) / QCGBMS304-6 | 0.09   | 0.03   | 2.06   | 0.02   | <0.002 | 20.4   | 0.019  | 0.30   |
| 19042292 / QCO153B         | 0.06   | <0.01  | 1.26   | <0.01  | <0.002 | 26.1   | 0.017  | 0.35   |
| 19042292 (2) / QCO153B     | 0.06   | <0.01  | 1.32   | <0.01  | <0.002 | 26.2   | 0.017  | 0.36   |
|                            |        |        |        |        |        |        |        |        |
| Parameter                  | V      | Y      | Zn     |        |        |        |        |        |
| Unit                       | %      | %      | %      |        |        |        |        |        |
| Detection limit            | 0.005  | 0.001  | 0.005  |        |        |        |        |        |
| 19042290 / QCBLIND         | <0.005 | <0.001 | <0.005 |        |        |        |        |        |
| 19042290 (2) / QCBLIND     | <0.005 | <0.001 | <0.005 |        |        |        |        |        |
| 19042290 (3) / QCBLIND     | <0.005 | <0.001 | <0.005 |        |        |        |        |        |
| 19042290 (4) / QCBLIND     | <0.005 | <0.001 | <0.005 |        |        |        |        |        |
| 19042291 / QCGBMS304-6     | 0.017  | 0.003  | 0.128  |        |        |        |        |        |
| 19042291 (2) / QCGBMS304-6 | 0.016  | 0.003  | 0.130  |        |        |        |        |        |
| 19042292 / QCO153B         | 0.024  | 0.002  | 0.012  |        |        |        |        |        |
| 19042292 (2) / QCO153B     | 0.023  | 0.002  | 0.012  |        |        |        |        |        |
|                            |        |        |        |        |        |        |        |        |

**Table S2.** Details on electron probe microanalyzer JEOL JXA-8530FPlus standards and crystals used, together with detection limit (DL, ppm) details. Analyses on R2/l samples. Number of data = 194

| Element | Crystal | Standard                       | DL Min | DL Max | DL Ave | DL Stdev |
|---------|---------|--------------------------------|--------|--------|--------|----------|
| F       | LDE1    | BaF <sub>2</sub>               | 97     | 248    | 144    | 31       |
| Mg      | TAP     | MgO                            | 84     | 126    | 104    | 8        |
| Al      | TAP     | Al <sub>2</sub> O <sub>3</sub> | 102    | 145    | 116    | 8        |
| Sc      | PETL    | Sc                             | 90     | 145    | 111    | 11       |
| Ca      | PETH    | Wollastonite                   | 79     | 197    | 105    | 21       |
| P       | PETL    | Apatite                        | 103    | 376    | 148    | 54       |
| Mn      | LIFL    | Rhodonite                      | 243    | 441    | 324    | 42       |
| Fe      | LIFL    | Hematite                       | 164    | 329    | 217    | 26       |
| Zr      | PETL    | Zr                             | 188    | 429    | 259    | 46       |
| Na      | TAPH    | Jadeite                        | 103    | 202    | 133    | 22       |
| K       | PETH    | Orthoclase                     | 56     | 94     | 70     | 7        |
| Si      | TAP     | Quartz                         | 122    | 257    | 167    | 20       |
| Ti      | LIFL    | Rutile                         | 107    | 179    | 139    | 13       |

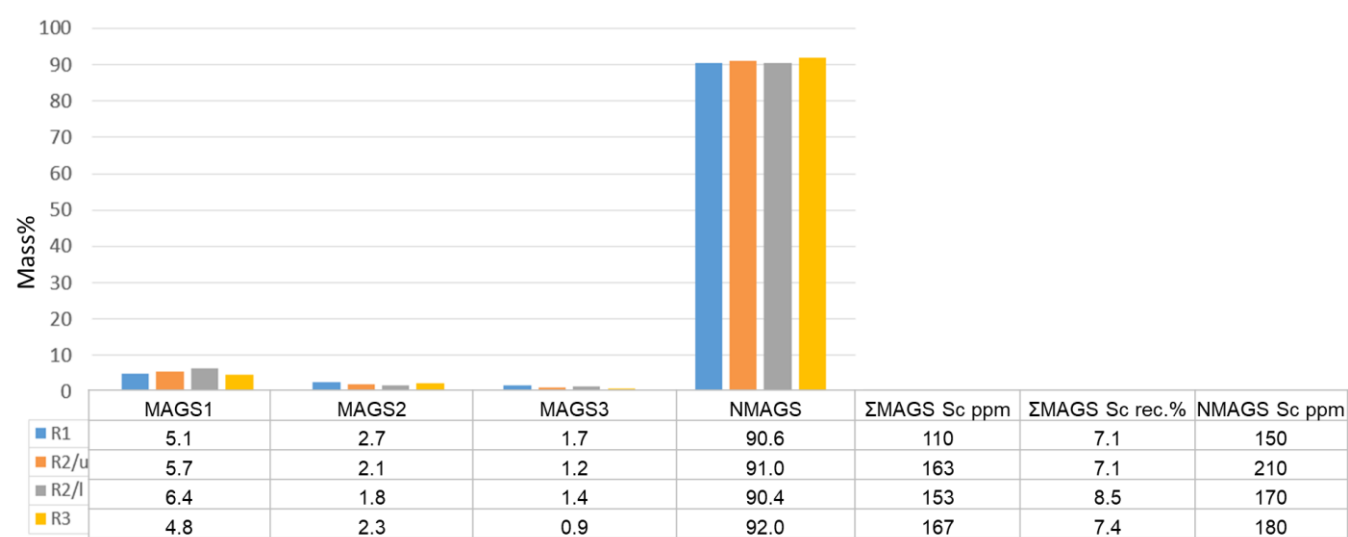

**Figure S1.** Details on the LIMS-separated fractions of Kiviniemi composite samples.

**Table S3.** Summary of amphibole (AM) and clinopyroxene (CPX) grain size descriptive statistics based on the GrainAlyzer ECD data ( $\mu\text{m}$ ).

|     |                | R1   |        |     |     | R2/u |        |     |     |
|-----|----------------|------|--------|-----|-----|------|--------|-----|-----|
|     |                | Mean | Median | Min | Max | Mean | Median | Min | Max |
| AM  | LIMS1          | 31   | 25     | 7   | 120 | 29   | 22     | 8   | 119 |
|     | LIMS2          | 25   | 22     | 7   | 109 | 25   | 19     | 7   | 129 |
|     | LIMS3          | 27   | 23     | 8   | 95  | 23   | 19     | 5   | 132 |
|     | Slon1 Mags     | 30   | 25     | 9   | 116 | 29   | 23     | 7   | 145 |
|     | Slon2 Mags     | 31   | 26     | 10  | 160 | 28   | 22     | 7   | 126 |
|     | Slon1 NMags    | 27   | 22     | 10  | 98  | 24   | 18     | 7   | 120 |
|     | Slon2 NMags    | 26   | 22     | 8   | 110 | 30   | 21     | 8   | 124 |
| CPX | LIMS1          | 29   | 25     | 8   | 107 | 29   | 22     | 7   | 109 |
|     | LIMS2          | 26   | 20     | 7   | 109 | 26   | 20     | 7   | 129 |
|     | LIMS3          | 27   | 23     | 8   | 95  | 24   | 19     | 7   | 136 |
|     | Slon1 Mags     | 30   | 26     | 8   | 106 | 30   | 23     | 8   | 140 |
|     | Slon2 Mags     | 31   | 27     | 8   | 109 | 29   | 22     | 6   | 117 |
|     | R2uSlon1 NMags | 23   | 20     | 11  | 63  | 22   | 16     | 7   | 120 |
|     | R2uSlon2 NMags | 28   | 24     | 9   | 82  | 25   | 17     | 8   | 124 |
|     |                | R2/l |        |     |     | R3   |        |     |     |
|     |                | Mean | Median | Min | Max | Mean | Median | Min | Max |
| AM  | LIMS1          | 28   | 20     | 6   | 142 | 27   | 22     | 7   | 118 |
|     | LIMS2          | 24   | 19     | 6   | 211 | 25   | 20     | 7   | 113 |
|     | LIMS3          | 23   | 18     | 7   | 127 | 25   | 20     | 6   | 213 |
|     | Slon1 Mags     | 27   | 21     | 7   | 211 | 27   | 23     | 7   | 159 |
|     | Slon2 Mags     | 28   | 21     | 6   | 193 | 27   | 22     | 7   | 128 |
|     | Slon1 NMags    | 24   | 18     | 6   | 233 | 25   | 18     | 6   | 135 |
|     | Slon2 NMags    | 29   | 20     | 6   | 192 | 25   | 20     | 8   | 78  |
| CPX | LIMS1          | 30   | 21     | 6   | 186 | 27   | 23     | 8   | 117 |
|     | LIMS2          | 26   | 20     | 7   | 208 | 25   | 20     | 6   | 113 |
|     | LIMS3          | 25   | 19     | 7   | 124 | 26   | 21     | 7   | 213 |
|     | Slon1 Mags     | 29   | 21     | 7   | 211 | 28   | 23     | 8   | 159 |
|     | Slon2 Mags     | 31   | 23     | 7   | 193 | 28   | 23     | 6   | 128 |
|     | R2uSlon1 NMags | 23   | 18     | 9   | 102 | 23   | 17     | 10  | 135 |
|     | R2uSlon2 NMags | 26   | 17     | 8   | 192 | 23   | 17     | 8   | 91  |

**Table S4.** Details on modal mineralogy. Calculated average feed, LIMS and SLon magnetic fractions and tailings for each composite sample (R1, R2/u, R2/l and R3).

| R1           |         |         |         |         |                |                 |                |                 |  | R2/u         |         |         |         |         |                |                 |                |                 |
|--------------|---------|---------|---------|---------|----------------|-----------------|----------------|-----------------|--|--------------|---------|---------|---------|---------|----------------|-----------------|----------------|-----------------|
|              | FEED    | LIMS1   | LIMS2   | LIMS3   | SLon_1<br>Mags | SLon_1<br>NMags | SLon_2<br>Mags | SLon_2<br>NMags |  |              | FEED    | LIMS1   | LIMS2   | LIMS3   | SLon_1<br>Mags | SLon_1<br>NMags | SLon_2<br>Mags | SLon_2<br>NMags |
| AM           | 13.05 % | 10.46 % | 15.64 % | 17.96 % | 21.65 %        | 1.59 %          | 22.02 %        | 2.06 %          |  | AM           | 13.62 % | 11.14 % | 16.40 % | 21.34 % | 19.43 %        | 3.03 %          | 20.77 %        | 2.54 %          |
| CPX          | 13.77 % | 8.19 %  | 14.80 % | 16.20 % | 23.71 %        | 0.80 %          | 24.95 %        | 0.95 %          |  | CPX          | 18.83 % | 13.80 % | 19.71 % | 21.44 % | 27.65 %        | 1.42 %          | 32.30 %        | 0.51 %          |
| FeOX         | 2.15 %  | 26.40 % | 7.00 %  | 5.01 %  | 0.68 %         | 0.02 %          | 1.37 %         | 0.01 %          |  | FeOX         | 1.62 %  | 20.29 % | 6.72 %  | 3.47 %  | 0.34 %         | 0.03 %          | 0.63 %         | 0.02 %          |
| FA           | 6.12 %  | 10.66 % | 8.32 %  | 9.67 %  | 9.51 %         | 0.11 %          | 10.79 %        | 0.18 %          |  | FA           | 7.54 %  | 14.18 % | 17.21 % | 10.64 % | 10.96 %        | 0.45 %          | 10.62 %        | 0.11 %          |
| ILM          | 2.57 %  | 1.26 %  | 2.11 %  | 2.36 %  | 5.08 %         | 0.02 %          | 4.52 %         | 0.02 %          |  | ILM          | 2.61 %  | 1.48 %  | 1.11 %  | 1.47 %  | 4.12 %         | 0.06 %          | 4.57 %         | 0.01 %          |
| SULF         | 0.45 %  | 4.65 %  | 2.13 %  | 1.27 %  | 0.07 %         | 0.11 %          | 0.28 %         | 0.13 %          |  | SULF         | 0.58 %  | 8.27 %  | 2.91 %  | 1.28 %  | 0.05 %         | 0.00 %          | 0.07 %         | 0.01 %          |
| GRT          | 4.10 %  | 1.85 %  | 3.42 %  | 3.48 %  | 7.17 %         | 0.47 %          | 7.44 %         | 0.31 %          |  | GRT          | 8.99 %  | 5.37 %  | 6.01 %  | 5.96 %  | 13.84 %        | 0.90 %          | 14.95 %        | 0.81 %          |
| CFS          | 3.18 %  | 14.55 % | 8.41 %  | 8.90 %  | 3.84 %         | 0.21 %          | 4.02 %         | 0.15 %          |  | CFS          | 1.41 %  | 11.48 % | 4.90 %  | 4.31 %  | 0.83 %         | 0.07 %          | 1.20 %         | 0.06 %          |
| BT+CHL       | 4.95 %  | 8.59 %  | 7.45 %  | 7.44 %  | 5.96 %         | 1.86 %          | 6.52 %         | 3.26 %          |  | BT+CHL       | 2.98 %  | 4.80 %  | 5.72 %  | 5.82 %  | 3.81 %         | 1.79 %          | 3.21 %         | 1.26 %          |
| PL           | 22.16 % | 3.61 %  | 11.25 % | 9.10 %  | 11.83 %        | 44.24 %         | 7.39 %         | 39.30 %         |  | PL           | 20.56 % | 2.50 %  | 7.53 %  | 9.78 %  | 9.33 %         | 44.53 %         | 6.03 %         | 47.96 %         |
| FSP          | 22.06 % | 4.80 %  | 13.42 % | 13.42 % | 7.42 %         | 42.46 %         | 7.02 %         | 45.61 %         |  | FSP          | 16.22 % | 3.08 %  | 7.10 %  | 9.14 %  | 6.72 %         | 38.24 %         | 3.52 %         | 37.18 %         |
| QTZ          | 2.23 %  | 4.32 %  | 3.21 %  | 2.07 %  | 1.28 %         | 2.81 %          | 1.59 %         | 3.04 %          |  | QTZ          | 1.57 %  | 2.20 %  | 2.28 %  | 1.85 %  | 0.96 %         | 2.89 %          | 0.76 %         | 2.34 %          |
| CAL          | 0.47 %  | 0.18 %  | 0.42 %  | 0.54 %  | 0.15 %         | 0.99 %          | 0.05 %         | 0.95 %          |  | CAL          | 0.31 %  | 0.19 %  | 0.29 %  | 0.38 %  | 0.12 %         | 0.48 %          | 0.17 %         | 0.70 %          |
| AP           | 2.17 %  | 0.29 %  | 1.00 %  | 1.47 %  | 1.48 %         | 3.34 %          | 1.24 %         | 3.75 %          |  | AP           | 2.00 %  | 0.82 %  | 1.22 %  | 1.56 %  | 0.65 %         | 4.78 %          | 0.48 %         | 4.55 %          |
| ZRN          | 0.18 %  | 0.00 %  | 0.20 %  | 0.14 %  | 0.04 %         | 0.39 %          | 0.22 %         | 0.14 %          |  | ZRN          | 0.83 %  | 0.07 %  | 0.13 %  | 0.17 %  | 0.81 %         | 0.90 %          | 0.63 %         | 1.52 %          |
| Unclassified | 0.39 %  | 0.20 %  | 1.23 %  | 0.93 %  | 0.14 %         | 0.58 %          | 0.60 %         | 0.16 %          |  | Unclassified | 0.33 %  | 0.35 %  | 0.74 %  | 1.41 %  | 0.40 %         | 0.45 %          | 0.11 %         | 0.43 %          |
| Σ            | 100.0 % | 100.0 % | 100.0 % | 100.0 % | 100.0 %        | 100.0 %         | 100.0 %        | 100.0 %         |  | Σ            | 100.0 % | 100.0 % | 100.0 % | 100.0 % | 100.0 %        | 100.0 %         | 100.0 %        | 100.0 %         |
| R2/I         |         |         |         |         |                |                 |                |                 |  | R3           |         |         |         |         |                |                 |                |                 |
|              | FEED    | LIMS1   | LIMS2   | LIMS3   | SLon_1<br>Mags | SLon_1<br>NMags | SLon_2<br>Mags | SLon_2<br>NMags |  |              | FEED    | LIMS1   | LIMS2   | LIMS3   | SLon_1<br>Mags | SLon_1<br>NMags | SLon_2<br>Mags | SLon_2<br>NMags |
| AM           | 25.44 % | 18.75 % | 33.90 % | 37.10 % | 34.45 %        | 4.32 %          | 38.37 %        | 2.04 %          |  | AM           | 14.93 % | 17.41 % | 24.79 % | 23.77 % | 25.29 %        | 3.64 %          | 25.31 %        | 1.48 %          |
| CPX          | 12.65 % | 12.73 % | 19.24 % | 17.88 % | 16.55 %        | 1.27 %          | 19.52 %        | 0.50 %          |  | CPX          | 11.25 % | 9.88 %  | 12.86 % | 13.98 % | 20.08 %        | 0.99 %          | 21.05 %        | 1.03 %          |
| FeOX         | 1.87 %  | 20.20 % | 4.99 %  | 3.14 %  | 1.21 %         | 0.01 %          | 0.16 %         | 0.03 %          |  | FeOX         | 1.33 %  | 22.04 % | 2.60 %  | 1.26 %  | 0.23 %         | 0.00 %          | 0.62 %         | 0.02 %          |
| FA           | 2.94 %  | 8.00 %  | 10.19 % | 6.21 %  | 3.14 %         | 0.32 %          | 3.81 %         | 0.02 %          |  | FA           | 4.01 %  | 11.23 % | 6.80 %  | 5.16 %  | 7.00 %         | 0.05 %          | 6.46 %         | 0.05 %          |
| ILM          | 2.07 %  | 0.77 %  | 0.87 %  | 0.77 %  | 2.73 %         | 0.19 %          | 3.72 %         | 0.01 %          |  | ILM          | 1.78 %  | 0.86 %  | 0.84 %  | 1.33 %  | 3.65 %         | 0.04 %          | 3.37 %         | 0.01 %          |
| SULF         | 0.36 %  | 4.02 %  | 1.19 %  | 0.95 %  | 0.06 %         | 0.12 %          | 0.08 %         | 0.08 %          |  | SULF         | 0.42 %  | 4.16 %  | 0.64 %  | 0.23 %  | 0.27 %         | 0.29 %          | 0.16 %         | 0.16 %          |
| GRT          | 9.79 %  | 4.31 %  | 3.92 %  | 4.46 %  | 14.27 %        | 1.02 %          | 15.93 %        | 0.21 %          |  | GRT          | 8.92 %  | 5.48 %  | 6.43 %  | 6.59 %  | 15.90 %        | 0.67 %          | 17.74 %        | 0.92 %          |
| CFS          | 1.92 %  | 14.79 % | 5.59 %  | 5.76 %  | 1.33 %         | 0.09 %          | 1.18 %         | 0.04 %          |  | CFS          | 0.24 %  | 2.86 %  | 1.11 %  | 0.59 %  | 0.15 %         | 0.01 %          | 0.16 %         | 0.01 %          |
| BT+CHL       | 4.01 %  | 8.87 %  | 5.59 %  | 6.81 %  | 4.53 %         | 1.14 %          | 5.10 %         | 0.98 %          |  | BT+CHL       | 5.05 %  | 8.70 %  | 7.98 %  | 7.97 %  | 7.01 %         | 1.95 %          | 8.13 %         | 1.40 %          |
| PL           | 22.00 % | 2.81 %  | 6.04 %  | 7.75 %  | 13.03 %        | 52.14 %         | 6.05 %         | 54.86 %         |  | PL           | 21.86 % | 3.99 %  | 14.13 % | 15.58 % | 9.48 %         | 38.01 %         | 6.33 %         | 41.32 %         |
| FSP          | 7.94 %  | 1.35 %  | 3.16 %  | 3.51 %  | 3.20 %         | 19.78 %         | 2.37 %         | 21.34 %         |  | FSP          | 24.26 % | 5.89 %  | 15.49 % | 17.40 % | 7.88 %         | 45.12 %         | 6.50 %         | 46.16 %         |
| QTZ          | 5.51 %  | 1.75 %  | 2.56 %  | 3.24 %  | 3.37 %         | 12.71 %         | 2.01 %         | 12.26 %         |  | QTZ          | 2.85 %  | 5.98 %  | 4.25 %  | 3.32 %  | 1.33 %         | 4.49 %          | 1.51 %         | 3.55 %          |
| CAL          | 0.45 %  | 0.27 %  | 0.57 %  | 0.47 %  | 0.36 %         | 0.65 %          | 0.37 %         | 0.66 %          |  | CAL          | 0.33 %  | 0.16 %  | 0.43 %  | 0.38 %  | 0.20 %         | 0.53 %          | 0.25 %         | 0.37 %          |
| AP           | 1.77 %  | 0.83 %  | 1.17 %  | 0.99 %  | 1.05 %         | 4.09 %          | 0.42 %         | 4.28 %          |  | AP           | 1.55 %  | 0.43 %  | 0.67 %  | 1.31 %  | 0.77 %         | 2.90 %          | 0.47 %         | 2.59 %          |
| ZRN          | 1.10 %  | 0.36 %  | 0.53 %  | 0.22 %  | 0.64 %         | 1.94 %          | 0.71 %         | 2.48 %          |  | ZRN          | 0.46 %  | 0.13 %  | 0.07 %  | 0.22 %  | 0.31 %         | 0.68 %          | 0.43 %         | 0.58 %          |
| Unclassified | 0.17 %  | 0.22 %  | 0.52 %  | 0.76 %  | 0.09 %         | 0.22 %          | 0.21 %         | 0.22 %          |  | Unclassified | 0.77 %  | 0.81 %  | 0.92 %  | 0.92 %  | 0.45 %         | 0.64 %          | 1.52 %         | 0.36 %          |
| Σ            | 100.0 % | 100.0 % | 100.0 % | 100.0 % | 100.0 %        | 100.0 %         | 100.0 %        | 100.0 %         |  | Σ            | 100.0 % | 100.0 % | 100.0 % | 100.0 % | 100.0 %        | 100.0 %         | 100.0 %        | 100.0 %         |

**Table S5a.** Amphibole in magnetic concentrates: sums of liberated and binary or ternary area associations (%).

|              | R1<br>LIMS1 | R1<br>LIMS2 | R1<br>LIMS3 | R1_1 | R1_2 | R2/u<br>LIMS1 | R2/u<br>LIMS2 | R2/u<br>LIMS3 | R2/u_1 | R2/u_2 | R2l/<br>LIMS1 | R2l/<br>LIMS2 | R2l/<br>LIMS3 | R2/l_1 | R2/l_2 | R3<br>LIMS1 | R3<br>LIMS2 | R3<br>LIMS3 | R3_1 | R3_2 |
|--------------|-------------|-------------|-------------|------|------|---------------|---------------|---------------|--------|--------|---------------|---------------|---------------|--------|--------|-------------|-------------|-------------|------|------|
| AM           | 42.7        | 67.8        | 66.0        | 55.8 | 62.9 | 64.4          | 57.1          | 56.6          | 66.3   | 76.1   | 58.7          | 73.3          | 78.7          | 75.4   | 77.3   | 61.3        | 55.2        | 71.1        | 78.1 | 72.5 |
| CPX          | 3.9         | 4.6         | 11.0        | 15.8 | 10.5 | 3.2           | 12.8          | 14.3          | 8.3    | 5.5    | 7.4           | 6.3           | 6.5           | 5.9    | 9.2    | 4.2         | 8.8         | 2.6         | 4.4  | 8.1  |
| FeOx         | 12.5        | 3.4         | 2.2         | 0.2  | 0.4  | 6.0           | 3.2           | 1.5           | 0.1    | 0.1    | 8.0           | 1.8           | 1.3           | 1.3    | 0.1    | 6.3         | 1.2         | 0.5         | 0.0  | 0.2  |
| FA           | 6.4         | 2.3         | 1.3         | 2.4  | 2.8  | 4.3           | 3.9           | 5.1           | 2.1    | 1.8    | 4.6           | 5.8           | 2.9           | 0.9    | 0.9    | 3.1         | 3.7         | 1.3         | 1.4  | 2.1  |
| ILM          | 0.3         | 0.6         | 0.2         | 0.9  | 1.0  | 1.0           | 0.1           | 0.3           | 1.5    | 2.3    | 0.6           | 0.2           | 0.2           | 1.1    | 0.5    | 0.6         | 0.3         | 0.4         | 0.7  | 0.5  |
| SULF         | 4.1         | 0.4         | 1.2         | 0.0  | 0.5  | 5.5           | 1.5           | 0.9           | 0.0    | 0.1    | 1.6           | 0.5           | 0.3           | 0.0    | 0.0    | 1.3         | 0.2         | 0.0         | 0.0  | 0.1  |
| GRT          | 3.1         | 1.1         | 1.9         | 2.9  | 2.9  | 2.3           | 5.7           | 2.7           | 4.4    | 2.7    | 0.1           | 1.3           | 0.6           | 1.1    | 0.1    | 2.5         | 3.4         | 1.7         | 2.3  | 3.4  |
| CFS          | 8.8         | 1.8         | 2.5         | 1.5  | 1.3  | 2.4           | 1.3           | 1.6           | 0.1    | 0.1    | 6.8           | 1.9           | 1.7           | 0.2    | 0.1    | 1.0         | 0.6         | 0.3         | 0.1  | 0.0  |
| BT + CHL     | 7.4         | 5.7         | 6.6         | 6.3  | 3.1  | 4.0           | 6.4           | 4.6           | 3.7    | 1.1    | 7.2           | 2.6           | 2.4           | 1.5    | 2.2    | 5.3         | 5.0         | 2.9         | 1.7  | 4.2  |
| PLG          | 1.3         | 3.0         | 2.2         | 5.8  | 5.8  | 2.1           | 2.4           | 4.8           | 4.9    | 5.8    | 1.8           | 1.8           | 2.0           | 8.4    | 4.3    | 2.6         | 7.5         | 7.5         | 4.7  | 2.3  |
| FSP          | 2.6         | 4.0         | 2.9         | 4.3  | 4.3  | 2.2           | 2.2           | 3.3           | 5.8    | 3.0    | 0.6           | 0.9           | 1.0           | 0.7    | 2.1    | 3.6         | 8.2         | 7.8         | 4.5  | 4.0  |
| QTZ + CAL    | 4.9         | 3.0         | 1.2         | 0.8  | 2.1  | 1.5           | 1.6           | 2.0           | 1.5    | 0.9    | 1.2           | 2.3           | 1.6           | 2.8    | 1.9    | 5.0         | 3.8         | 2.0         | 1.5  | 0.7  |
| AP           | 0.0         | 0.6         | 0.2         | 0.1  | 1.1  | 0.1           | 0.6           | 0.7           | 0.0    | 0.1    | 0.2           | 0.5           | 0.1           | 0.0    | 0.2    | 0.0         | 0.3         | 0.6         | 0.0  | 0.1  |
| ZRN          | 0.0         | 0.0         | 0.0         | 0.0  | 0.3  | 0.0           | 0.0           | 0.0           | 0.3    | 0.0    | 0.1           | 0.3           | 0.0           | 0.4    | 0.5    | 0.2         | 0.0         | 0.1         | 0.0  | 0.0  |
| Unclassified | 2.0         | 1.7         | 0.6         | 3.2  | 1.0  | 1.0           | 1.2           | 1.6           | 1.0    | 0.4    | 1.1           | 0.5           | 0.7           | 0.3    | 0.6    | 3.0         | 1.8         | 1.2         | 0.6  | 1.8  |

**Table S5b.** Amphibole in tailings: sums of liberated and binary or ternary area associations (%).

|              | R1_1 | R1_2 | R2/u_1 | R2/u_2 | R2/l_1 | R2/l_2 | R3_1 | R3_2 |
|--------------|------|------|--------|--------|--------|--------|------|------|
| AM           | 22.1 | 25.2 | 23.1   | 21.1   | 41.0   | 19.4   | 43.3 | 27.1 |
| CPX          | 0.9  | 1.2  | 1.2    | 1.2    | 1.8    | 0.6    | 0.7  | 3.2  |
| FeOx         | 0.0  | 0.0  | 0.1    | 0.0    | 0.0    | 0.1    | 0.0  | 0.0  |
| FA           | 0.2  | 0.3  | 0.2    | 0.0    | 0.1    | 0.0    | 0.1  | 0.0  |
| ILM          | 0.0  | 0.1  | 0.0    | 0.0    | 0.0    | 0.0    | 0.0  | 0.0  |
| SULF         | 0.0  | 0.0  | 0.0    | 0.0    | 0.0    | 0.0    | 0.1  | 0.0  |
| GRT          | 1.0  | 0.3  | 0.4    | 0.4    | 0.6    | 0.3    | 0.1  | 1.4  |
| CFS          | 0.5  | 0.5  | 0.1    | 0.1    | 0.1    | 0.1    | 0.0  | 0.0  |
| BT + CHL     | 3.9  | 5.2  | 1.5    | 1.7    | 2.0    | 2.8    | 3.1  | 3.1  |
| PLG          | 39.1 | 34.2 | 34.6   | 36.5   | 23.3   | 42.5   | 17.0 | 26.4 |
| FSP          | 23.5 | 26.1 | 27.8   | 32.4   | 21.5   | 28.0   | 28.4 | 30.7 |
| QTZ + CAL    | 5.0  | 4.8  | 0.7    | 2.4    | 3.8    | 3.5    | 3.1  | 4.5  |
| AP           | 1.0  | 0.4  | 7.2    | 2.0    | 0.6    | 0.6    | 2.4  | 0.8  |
| ZRN          | 0.3  | 0.0  | 0.5    | 0.6    | 2.6    | 1.4    | 0.5  | 0.0  |
| Unclassified | 2.5  | 1.7  | 2.6    | 1.6    | 2.6    | 0.7    | 1.2  | 2.8  |

**Table S5c.** Clinopyroxene in magnetic concentrates: sums of liberated and binary or ternary area associations (%).

|              | R1<br>LIMS1 | R1<br>LIMS2 | R1<br>LIMS3 | R1_1 | R1_2 | R2/u<br>LIMS1 | R2/u<br>LIMS2 | R2/u<br>LIMS3 | R2/u_1 | R2/u_2 | R2l/<br>LIMS1 | R2l/<br>LIMS2 | R2l/<br>LIMS3 | R2/l_1 | R2/l_2 | R3<br>LIMS1 | R3<br>LIMS2 | R3<br>LIMS3 | R3_1 | R3_2 |
|--------------|-------------|-------------|-------------|------|------|---------------|---------------|---------------|--------|--------|---------------|---------------|---------------|--------|--------|-------------|-------------|-------------|------|------|
| CPX          | 45.5        | 72.0        | 70.4        | 69.4 | 65.9 | 79.3          | 63.9          | 60.2          | 83.7   | 87.2   | 52.1          | 65.5          | 67.3          | 80.1   | 79.3   | 65.7        | 43.8        | 58.0        | 83.5 | 77.6 |
| AM           | 9.8         | 7.1         | 13.4        | 12.3 | 15.1 | 2.1           | 10.4          | 12.8          | 6.8    | 3.9    | 11.0          | 14.0          | 19.2          | 8.4    | 12.2   | 8.0         | 20.2        | 13.0        | 6.8  | 9.7  |
| FeOx         | 13.7        | 2.0         | 1.5         | 0.2  | 0.4  | 5.7           | 2.6           | 1.6           | 0.1    | 0.1    | 8.3           | 2.3           | 1.6           | 2.8    | 0.1    | 6.7         | 1.6         | 0.9         | 0.1  | 0.1  |
| FA           | 5.9         | 3.1         | 1.4         | 3.2  | 4.2  | 4.2           | 4.4           | 5.6           | 1.8    | 2.3    | 5.4           | 7.4           | 2.5           | 1.0    | 2.1    | 3.4         | 4.1         | 2.2         | 1.6  | 1.5  |
| ILM          | 1.0         | 0.2         | 1.2         | 0.5  | 0.6  | 0.0           | 0.1           | 0.7           | 0.4    | 1.2    | 0.1           | 0.2           | 0.0           | 0.7    | 0.8    | 0.1         | 0.3         | 0.7         | 0.4  | 0.3  |
| SULF         | 2.8         | 0.7         | 0.1         | 0.0  | 0.0  | 1.5           | 1.7           | 0.7           | 0.0    | 0.0    | 2.3           | 0.5           | 0.6           | 0.0    | 0.0    | 1.4         | 0.3         | 0.0         | 0.0  | 0.0  |
| GRT          | 1.1         | 0.3         | 0.2         | 1.6  | 1.4  | 0.1           | 2.5           | 1.2           | 1.2    | 1.7    | 0.0           | 0.3           | 0.5           | 0.3    | 0.6    | 0.5         | 2.8         | 1.3         | 0.6  | 3.5  |
| CFS          | 4.6         | 1.8         | 1.6         | 1.1  | 1.0  | 1.1           | 2.3           | 2.8           | 0.1    | 0.2    | 8.3           | 2.5           | 2.1           | 0.0    | 0.0    | 1.0         | 0.6         | 0.3         | 0.1  | 0.0  |
| BT + CHL     | 4.9         | 4.0         | 3.3         | 2.6  | 2.0  | 1.9           | 4.4           | 3.0           | 0.6    | 0.4    | 7.6           | 2.6           | 1.5           | 0.8    | 0.7    | 3.8         | 4.8         | 3.1         | 1.8  | 1.9  |
| PLG          | 1.0         | 0.8         | 1.8         | 3.3  | 2.7  | 0.5           | 1.8           | 4.0           | 1.4    | 1.3    | 0.9           | 0.7           | 0.5           | 2.0    | 2.0    | 0.5         | 6.9         | 7.7         | 2.1  | 0.6  |
| FSP          | 2.3         | 2.8         | 2.2         | 1.9  | 2.5  | 0.8           | 1.1           | 1.9           | 1.9    | 0.7    | 0.9           | 1.4           | 1.3           | 0.2    | 0.3    | 0.6         | 6.6         | 7.9         | 1.4  | 1.4  |
| QTZ + CAL    | 5.0         | 2.6         | 2.2         | 0.8  | 1.2  | 1.5           | 2.9           | 3.2           | 1.1    | 0.8    | 1.7           | 2.0           | 1.9           | 3.2    | 1.8    | 5.3         | 6.0         | 2.7         | 1.1  | 0.8  |
| AP           | 0.0         | 0.3         | 0.2         | 0.4  | 1.6  | 0.0           | 0.2           | 0.3           | 0.1    | 0.0    | 0.0           | 0.2           | 0.0           | 0.0    | 0.0    | 0.0         | 0.4         | 0.3         | 0.0  | 0.4  |
| ZRN          | 0.0         | 0.0         | 0.0         | 0.0  | 0.2  | 0.0           | 0.0           | 0.0           | 0.2    | 0.1    | 0.2           | 0.1           | 0.1           | 0.1    | 0.1    | 0.4         | 0.0         | 0.0         | 0.0  | 0.5  |
| Unclassified | 2.4         | 2.3         | 0.5         | 2.7  | 1.2  | 1.3           | 1.7           | 2.0           | 0.6    | 0.1    | 1.2           | 0.3           | 0.9           | 0.4    | 0.0    | 2.6         | 1.6         | 1.9         | 0.5  | 1.7  |

**Table S5d.** Clinopyroxene in tailings: sums of liberated and binary or ternary area associations (%).

|              | R1_1 | R1_2 | R2/u_1 | R2/u_2 | R2/l_1 | R2/l_2 | R3_1 | R3_2 |
|--------------|------|------|--------|--------|--------|--------|------|------|
| CPX          | 37.4 | 29.4 | 21.5   | 12.9   | 45.5   | 18.5   | 27.5 | 70.4 |
| AM           | 6.5  | 15.5 | 19.9   | 30.8   | 12.3   | 8.3    | 44.6 | 7.3  |
| FeOx         | 0.0  | 0.0  | 0.0    | 0.0    | 0.1    | 0.2    | 0.0  | 0.0  |
| FA           | 0.0  | 0.2  | 0.1    | 0.0    | 0.1    | 0.0    | 0.0  | 0.0  |
| ILM          | 0.0  | 0.0  | 0.1    | 0.0    | 0.0    | 0.0    | 0.0  | 0.0  |
| SULF         | 0.0  | 0.0  | 0.0    | 0.0    | 0.0    | 0.0    | 0.0  | 0.0  |
| GRT          | 0.3  | 0.4  | 0.5    | 1.2    | 0.5    | 0.3    | 0.2  | 0.9  |
| CFS          | 0.0  | 0.3  | 0.1    | 0.0    | 0.0    | 0.0    | 0.0  | 0.0  |
| BT + CHL     | 1.0  | 4.8  | 1.0    | 0.2    | 1.7    | 0.8    | 0.8  | 0.3  |
| PLG          | 26.6 | 26.4 | 28.8   | 16.7   | 27.3   | 57.0   | 5.6  | 4.9  |
| FSP          | 23.4 | 19.3 | 23.0   | 25.4   | 2.7    | 10.9   | 7.5  | 3.9  |
| QTZ + CAL    | 2.7  | 0.8  | 0.9    | 1.4    | 4.7    | 1.3    | 0.6  | 9.2  |
| AP           | 0.3  | 0.6  | 1.3    | 1.5    | 0.7    | 1.1    | 9.8  | 0.2  |
| ZRN          | 0.0  | 0.0  | 0.1    | 6.9    | 2.5    | 0.6    | 0.3  | 0.0  |
| Unclassified | 1.8  | 2.3  | 2.7    | 3.0    | 1.9    | 1.0    | 3.1  | 2.9  |

**Table S6.** Summary of EPMA analysis results: average values for each mineral/sample provided. Minimum and maximum values for all analyses provided. N = number of analyses.

|         | SiO <sub>2</sub> | TiO <sub>2</sub> | Al <sub>2</sub> O <sub>3</sub> | FeO  | MnO  | MgO  | CaO  | Na <sub>2</sub> O | K <sub>2</sub> O | P <sub>2</sub> O <sub>5</sub> | Sc <sub>2</sub> O <sub>3</sub> | ZrO <sub>2</sub> | SUM   | Sc <sub>2</sub> O <sub>3</sub> ppm | F    | N  |
|---------|------------------|------------------|--------------------------------|------|------|------|------|-------------------|------------------|-------------------------------|--------------------------------|------------------|-------|------------------------------------|------|----|
| R1 FA   | 28.9             | 0.03             | 0.00                           | 65.3 | 1.72 | 1.17 | 0.06 | 0.02              | 0.00             | 0.01                          | 0.01                           | 0.00             | 97.2  | 128                                | 0.00 | 6  |
| R2u FA  | 28.7             | 0.06             | 0.00                           | 65.8 | 1.18 | 0.86 | 0.09 | 0.01              | 0.01             | 0.01                          | 0.00                           | 0.00             | 96.7  | 37                                 | 0.00 | 7  |
| R2l FA  | 29.2             | 0.02             | 0.00                           | 68.2 | 2.28 | 0.58 | 0.03 | 0.01              | 0.00             | 0.00                          | 0.00                           | 0.02             | 100.4 | 42                                 | 0.00 | 12 |
| R3 FA   | 29.2             | 0.01             | 0.00                           | 65.3 | 1.35 | 0.96 | 0.08 | 0.02              | 0.02             | 0.00                          | 0.00                           | 0.01             | 97.0  | 45                                 | 0.00 | 8  |
| FA MIN  | 27.7             | 0.00             | 0.00                           | 61.9 | 0.89 | 0.29 | 0.00 | 0.00              | 0.00             | 0.00                          | 0.00                           | 0.00             |       | 0                                  |      |    |
| FA MAX  | 30.9             | 0.23             | 0.01                           | 69.1 | 3.10 | 1.42 | 0.23 | 0.05              | 0.04             | 0.04                          | 0.02                           | 0.06             |       | 220                                |      |    |
| R1 ILM  | 0.00             | 51.46            | 0.04                           | 46.7 | 0.78 | 0.04 | 0.04 | 0.00              | 0.00             | 0.00                          | 0.01                           | 0.02             | 99.1  | 94                                 | 0.06 | 8  |
| R2u ILM | 0.00             | 52.78            | 0.03                           | 46.1 | 0.75 | 0.01 | 0.06 | 0.02              | 0.00             | 0.00                          | 0.00                           | 0.02             | 99.8  | 0                                  | 0.15 | 7  |
| R3 ILM  | 0.00             | 51.56            | 0.05                           | 47.1 | 0.45 | 0.06 | 0.07 | 0.00              | 0.01             | 0.00                          | 0.00                           | 0.04             | 99.3  | 0                                  | 0.00 | 1  |
| ILM MIN | 0.00             | 50.12            | 0.00                           | 43.9 | 0.38 | 0.00 | 0.00 | 0.00              | 0.00             | 0.00                          | 0.00                           | 0.00             |       | 0                                  |      |    |
| ILM MAX | 0.00             | 53.87            | 0.08                           | 47.2 | 1.10 | 0.10 | 0.11 | 0.06              | 0.01             | 0.02                          | 0.02                           | 0.08             |       | 210                                |      |    |
| R1 GRT  | 36.2             | 0.08             | 19.7                           | 31.7 | 1.41 | 0.52 | 8.33 | 0.01              | 0.00             | 0.00                          | 0.01                           | 0.01             | 98.0  | 63                                 | 0.00 | 13 |
| R2u GRT | 36.6             | 0.07             | 19.9                           | 31.2 | 1.87 | 0.34 | 8.61 | 0.00              | 0.00             | 0.01                          | 0.01                           | 0.01             | 98.7  | 77                                 | 0.00 | 6  |
| R2l GRT | 36.8             | 0.04             | 20.1                           | 32.4 | 2.28 | 0.39 | 8.41 | 0.01              | 0.00             | 0.00                          | 0.01                           | 0.02             | 100.4 | 73                                 | 0.03 | 17 |
| R3 GRT  | 36.3             | 0.02             | 19.9                           | 31.2 | 1.85 | 0.28 | 8.69 | 0.00              | 0.00             | 0.01                          | 0.01                           | 0.01             | 98.2  | 123                                | 0.00 | 3  |
| GRT MIN | 35.8             | 0.00             | 19.4                           | 30.5 | 0.84 | 0.24 | 7.62 | 0.00              | 0.00             | 0.00                          | 0.00                           | 0.00             |       | 0                                  |      |    |
| GRT MAX | 37.5             | 0.16             | 20.3                           | 33.0 | 2.97 | 0.59 | 9.34 | 0.06              | 0.01             | 0.03                          | 0.03                           | 0.06             |       | 260                                |      |    |
| R1 CFS  | 45.8             | 0.08             | 0.24                           | 45.7 | 0.96 | 3.88 | 0.84 | 0.03              | 0.00             | 0.01                          | 0.00                           | 0.00             | 97.5  | 0                                  | 0.00 | 2  |
| R2l CFS | 48.2             | 0.03             | 0.28                           | 44.5 | 1.25 | 2.42 | 0.55 | 0.06              | 0.00             | 0.00                          | 0.01                           | 0.01             | 97.3  | 110                                | 0.00 | 9  |
| CFS MIN | 45.7             | 0.00             | 0.01                           | 43.5 | 0.59 | 2.02 | 0.42 | 0.01              | 0.00             | 0.00                          | 0.00                           | 0.00             |       | 0                                  |      |    |
| CFS MAX | 48.7             | 0.12             | 1.25                           | 45.8 | 2.59 | 4.01 | 1.07 | 0.21              | 0.02             | 0.01                          | 0.03                           | 0.02             |       | 340                                |      |    |
| R1 PL   | 56.2             | 0.02             | 26.3                           | 0.71 | 0.02 | 0.01 | 8.65 | 6.51              | 0.18             | 0.01                          | 0.00                           | 0.01             | 98.6  | 30                                 | 0.00 | 19 |
| R2u PL  | 58.9             | 0.02             | 25.0                           | 0.62 | 0.01 | 0.01 | 7.16 | 7.32              | 0.17             | 0.01                          | 0.00                           | 0.01             | 99.2  | 27                                 | 0.00 | 18 |
| R2l PL  | 61.4             | 0.05             | 23.6                           | 0.15 | 0.00 | 0.00 | 4.70 | 8.19              | 0.23             | 0.00                          | 0.00                           | 0.00             | 98.3  | 0                                  | 0.00 | 1  |
| R3 PL   | 57.8             | 0.01             | 25.8                           | 0.37 | 0.01 | 0.00 | 7.84 | 7.06              | 0.23             | 0.01                          | 0.00                           | 0.01             | 99.1  | 10                                 | 0.00 | 20 |
| PL MIN  | 53.8             | 0.00             | 23.0                           | 0.15 | 0.00 | 0.00 | 4.70 | 5.68              | 0.06             | 0.00                          | 0.00                           |                  |       | 0                                  |      |    |
| PL MAX  | 61.4             | 0.11             | 27.5                           | 3.47 | 0.07 | 0.03 | 9.66 | 8.69              | 1.27             | 0.03                          | 0.04                           |                  |       | 400                                |      |    |
| R1 FSP  | 62.5             | 0.02             | 18.4                           | 0.35 | 0.01 | 0.00 | 0.10 | 1.66              | 13.9             | 0.01                          | 0.00                           | 0.01             | 97.0  | 10                                 | 0.00 | 9  |
| R2u FSP | 62.5             | 0.01             | 18.4                           | 0.36 | 0.01 | 0.00 | 0.05 | 1.39              | 14.2             | 0.01                          | 0.00                           | 0.01             | 96.9  | 22                                 | 0.00 | 13 |
| R3 FSP  | 62.5             | 0.02             | 18.3                           | 0.31 | 0.01 | 0.00 | 0.04 | 1.18              | 14.6             | 0.00                          | 0.00                           | 0.01             | 96.9  | 23                                 | 0.00 | 20 |
| FSP MIN | 60.9             | 0.00             | 17.83                          | 0.16 | 0.00 | 0.00 | 0.01 | 0.72              | 10.7             | 0.00                          | 0.00                           | 0.00             |       | 0                                  |      |    |
| FSP MAX | 65.1             | 0.06             | 18.75                          | 0.95 | 0.05 | 0.02 | 0.23 | 4.21              | 15.5             | 0.04                          | 0.02                           | 0.07             |       | 160                                |      |    |
| R1 QTZ  | 97.9             | 0.08             | 0.58                           | 0.40 | 0.00 | 0.00 | 0.06 | 0.02              | 0.02             | 0.00                          | 0.00                           | 0.00             | 99.1  | 0                                  | 0.00 | 1  |
| R2u QTZ | 98.3             | 0.03             | 0.00                           | 0.34 | 0.00 | 0.00 | 0.01 | 0.00              | 0.00             | 0.01                          | 0.00                           | 0.00             | 98.7  | 0                                  | 0.00 | 1  |
| R2l QTZ | 100.0            | 0.01             | 0.00                           | 0.85 | 0.00 | 0.00 | 0.01 | 0.00              | 0.00             | 0.00                          | 0.00                           | 0.03             | 100.9 | 0                                  | 0.00 | 3  |
| R3 QTZ  | 98.8             | 0.00             | 0.01                           | 0.27 | 0.01 | 0.00 | 0.01 | 0.01              | 0.00             | 0.01                          | 0.00                           | 0.00             | 99.1  | 0                                  | 0.00 | 3  |
| QTZ MIN | 97.3             | 0.00             | 0.00                           | 0.19 | 0.00 | 0.00 | 0.00 | 0.00              | 0.00             | 0.00                          | 0.00                           | 0.00             |       | 0                                  |      |    |
| QTZ MAX | 100.2            | 0.08             | 0.58                           | 1.04 | 0.03 | 0.01 | 0.06 | 0.02              | 0.02             | 0.02                          | 0.00                           | 0.08             |       | 0                                  |      |    |
| R1 AP   | 0.03             | 0.04             | 0.01                           | 0.50 | 0.03 | 0.01 | 55.5 | 0.00              | 0.01             | 42.5                          | 0.00                           | 0.06             | 98.7  | 0                                  | 3.63 | 3  |
| R2u AP  | 0.00             | 0.03             | 0.02                           | 0.31 | 0.03 | 0.00 | 56.1 | 0.00              | 0.01             | 42.7                          | 0.00                           | 0.05             | 99.3  | 0                                  | 3.85 | 1  |
| R2l AP  | 0.33             | 0.01             | 0.00                           | 0.13 | 0.01 | 0.00 | 56.5 | 0.00              | 0.00             | 43.2                          | 0.00                           | 0.11             | 103.9 | 0                                  | 3.61 | 9  |
| R3 AP   | 0.00             | 0.01             | 0.01                           | 0.21 | 0.01 | 0.01 | 55.8 | 0.00              | 0.00             | 42.7                          | 0.00                           | 0.05             | 98.7  | 0                                  | 3.64 | 2  |
| AP MIN  | 0.00             | 0.00             | 0.00                           | 0.06 | 0.00 | 0.00 | 54.9 | 0.00              | 0.00             | 42.1                          | 0.00                           | 0.03             |       | 0                                  |      |    |
| AP MAX  | 0.49             | 0.08             | 0.02                           | 0.59 | 0.08 | 0.02 | 58.3 | 0.00              | 0.02             | 44.0                          | 0.00                           | 0.19             |       | 0                                  |      |    |
| R1 ZRN  | 32.5             | 0.00             | 0.00                           | 0.39 | 0.01 | 0.01 | 0.02 | 0.07              | 0.00             | 0.00                          | 0.00                           | 66.7             | 99.7  | 0                                  | 0.00 | 1  |
| R2u ZRN | 32.8             | 0.06             | 0.00                           | 0.44 | 0.04 | 0.00 | 0.01 | 0.00              | 0.00             | 0.01                          | 0.01                           | 67.9             | 101.2 | 120                                | 0.00 | 1  |
| R2l ZRN | 32.7             | 0.02             | 0.00                           | 0.28 | 0.00 | 0.01 | 0.00 | 0.00              | 0.00             | 0.00                          | 0.01                           | 67.2             | 100.2 | 97                                 | 0.00 | 12 |
| R3 ZRN  | 32.6             | 0.03             | 0.02                           | 0.48 | 0.01 | 0.00 | 0.01 | 0.01              | 0.02             | 0.02                          | 0.02                           | 67.1             | 100.3 | 160                                | 0.00 | 1  |
| ZRN MIN | 32.5             | 0.00             | 0.00                           | 0.02 | 0.00 | 0.00 | 0.02 | 0.00              | 0.00             | 0.00                          | 0.00                           | 66.2             |       | 0                                  |      |    |
| ZRN MAX | 32.9             | 0.06             | 0.02                           | 1.63 | 0.03 | 0.03 | 1.63 | 0.02              | 0.03             | 0.02                          | 0.03                           | 68.1             |       | 300                                |      |    |

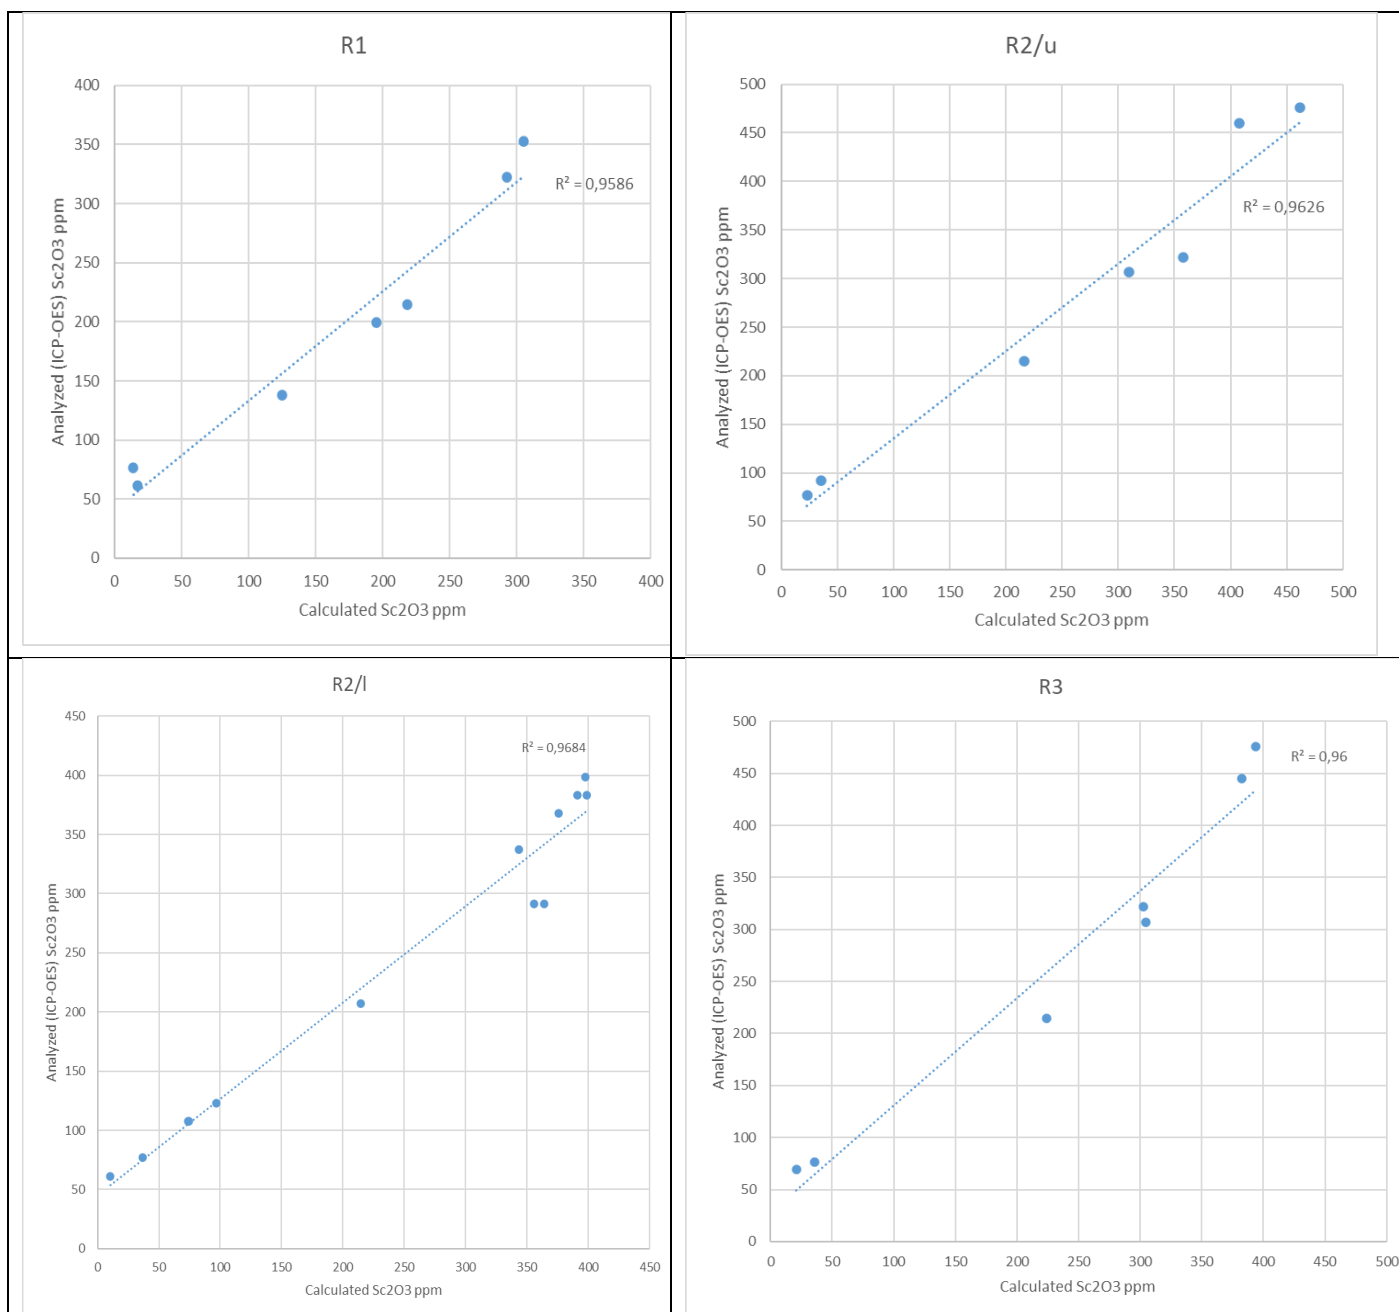

**Figure S2.** Calculated vs. analyzed Sc<sub>2</sub>O<sub>3</sub> for each composite sample (R1, R2/u, R2/l and R3) including LIMS MAGS1-3, SLon Mags and SLon NMags. Calculated values are based on EPMA analysis results for amphibole, clinopyroxene, fayalite and garnet and modal mineralogy from INCAMineral data.
